# Supplementary material
Source: PubMed Central journal article supplement (PMC4863989)
Supplement: NIHMS779768-supplement-Supporting_Information.pdf [file NIHMS779768-supplement-Supporting_Information.pdf]

# Symmetry Controlled, Genetic Presentation of Bio-Active Proteins on the P22 Virus-Like Particle Using an External Decoration Protein

Benjamin Schwarz<sup>1</sup>, Patrick Madden<sup>2</sup>, John Avera<sup>1</sup>, Bridget Gordon<sup>3</sup>, Kyle Larson<sup>4</sup>, Heini M. Miettinen<sup>4</sup>, Masaki Uchida<sup>1</sup>, Ben LaFrance<sup>2</sup>, Gautam Basu<sup>5</sup>, Agnieszka Rynda-Applé<sup>4</sup>, Trevor Douglas<sup>1</sup>

## SUPPLEMENTARY INFORMATION

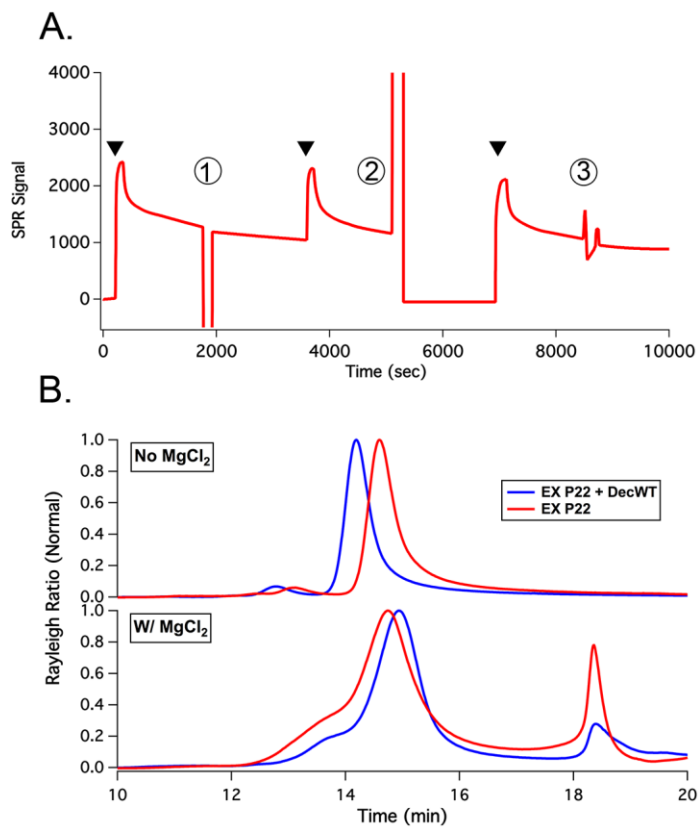

Supplemental Figure 1: High ionic-strength selectively reverses the Dec-P22 interaction but leaves P22 unaffected. A). 4M MgCl<sub>2</sub>(2) but not 0.35 mM EDTA (1) or 20% acetonitrile (3) regenerated the immobilized P22 surface after injection of 15  $\mu$ M DecWT. DecWT injection following MgCl<sub>2</sub> regeneration reached the same intensity as the injection preceding. DecWT

injections are marked by inverted black triangles. B). SEC-MALS of EX-P22 in the presence of DecWT (blue trace) shows a decrease in retention time compared to naked EX-P22. When 4M MgCl<sub>2</sub> is present in the sample (but not the running buffer) the retention shift due to Dec is lost but a particle peak is retained.

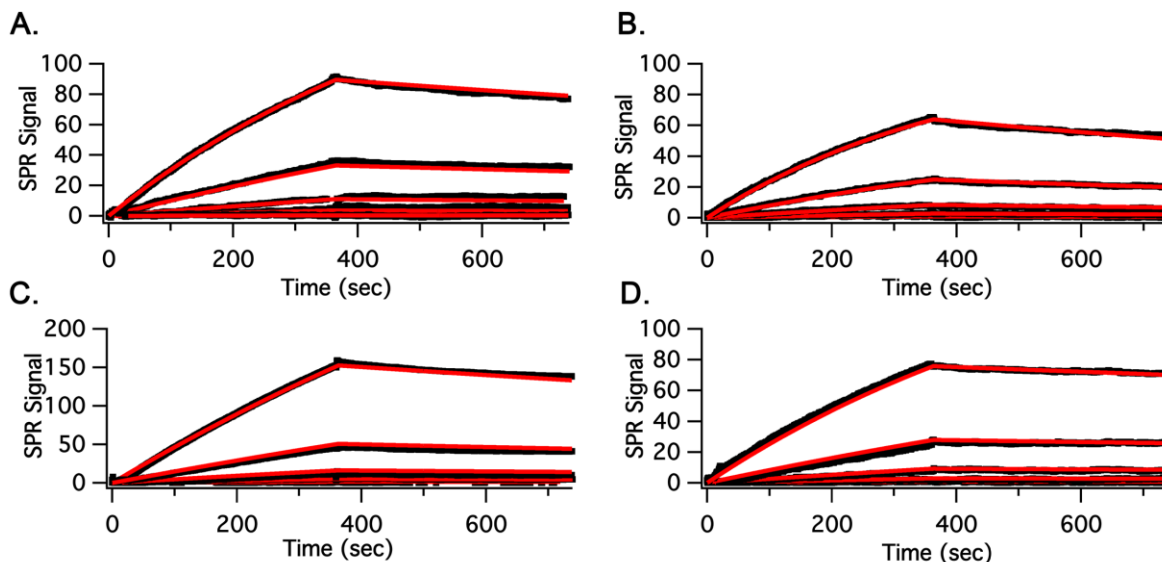

Supplemental Figure 2: Low-concentration dataset fitting shows only monophasic behavior. DecWT (A), DecΔ11 (B), DecCD40L (C), and DecSelf (D) SPR data from 1-100 nM are fit to a single site model. Parameters (Table) were used as initial inputs for two-site fitting. Each trace shows a sensorgram for a different analyte concentration. All graphs show one representative concentration set. Data traces are shown in black while fits are overlaid in red.

Supplemental Table 1: SPR kinetic binding parameters of Dec constructs and truncations for a one-site binding model. All parameters are the result of global fitting across three full concentration set replicates (1-100 nM Dec). Results were used as initial inputs for subsequent two-site model fitting. Error reflects one standard deviation as reported by the global fit utility in IGOR PRO.

| Construct | $k_a(M^{-1}s^{-1})$ | $k_d(s^{-1})$                  | $K_D(nM)$  |
|-----------|---------------------|--------------------------------|------------|
| DecWT     | 13,832 ± 93         | 3.30 ± 0.03 × 10 <sup>-4</sup> | 24.0 ± 0.3 |
| DecΔ11    | 18,704 ± 82         | 5.8 ± 0.03 × 10 <sup>-4</sup>  | 31 ± 0.2   |
| DecCD40L  | 4,314 ± 55          | 3.61 ± 0.06 × 10 <sup>-4</sup> | 83.4 ± 1.8 |
| DecSelf   | 13,159 ± 84         | 2.07 ± 0.03 × 10 <sup>-4</sup> | 15.7 ± 0.3 |

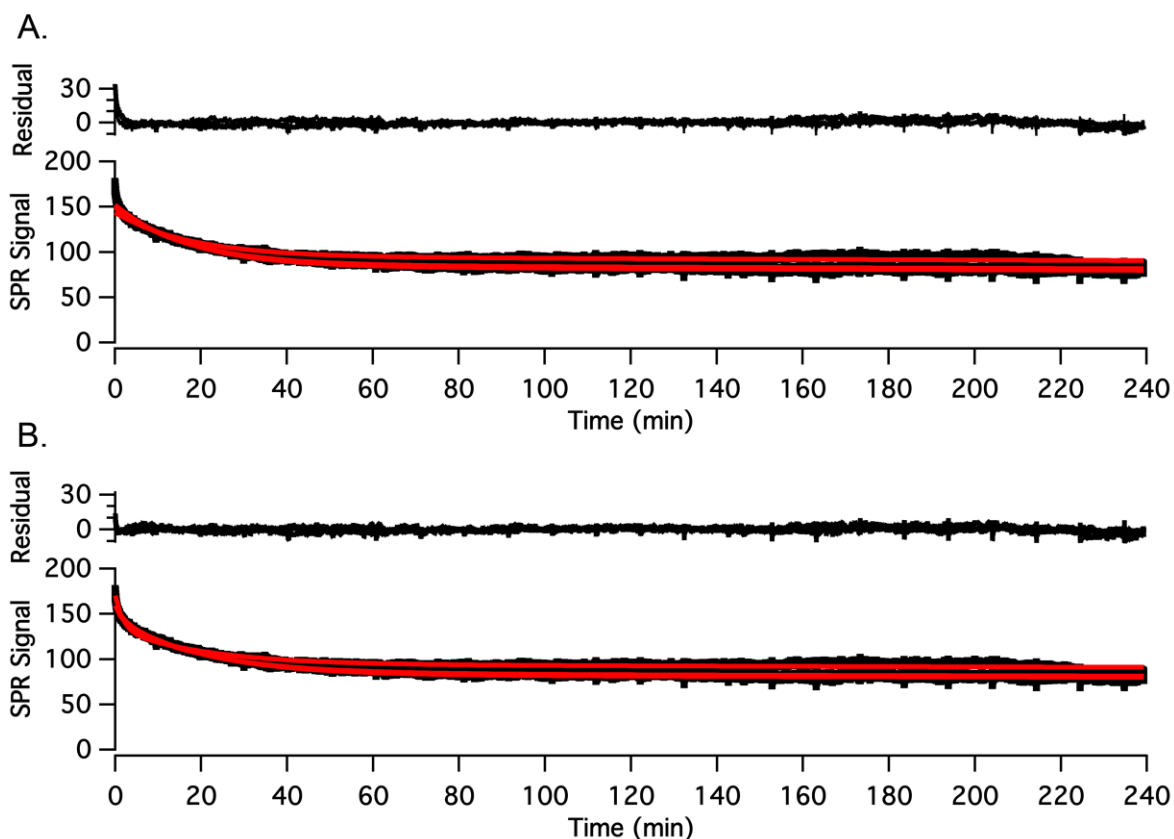

Supplemental Figure 3: Four-hour dissociation demonstrates a DecWT half-life of at least 60 hrs. A. The dissociation traces of 10  $\mu$ M DecWT injections are shown in triplicate. A two-site dissociation model was fit to the data resulting in  $k_{d1}$  of  $3.21 \pm 0.03 \times 10^{-6} \text{ sec}^{-1}$  and  $k_{d2}$  of  $9.55 \pm 0.02 \times 10^{-4} \text{ sec}^{-1}$ . B. To account for disagreement of the fit in the early region of the two-site model a third site was introduced which entirely accounted for the discrepancy. Three replicate runs are shown in each plot. Data traces are shown in black while fits are overlaid in red.

Supplemental Table 2: Occupancy of the SPR chip surface relative to DecWT is partially conserved across Dec constructs based on kinetic fit  $R_{\text{max}}$  ratios. Net  $R_{\text{max}}$  for each run of each construct was calculated by summing  $R_{\text{max}}$  for the tight site and the weak site of the two-site model.  $R_{\text{max}}$  for Dec $\Delta$ 20 was calculated from the single site model. Because the SPR channel was switched between runs net  $R_{\text{max}}$  ratios were calculated separately for the group of runs from channel 1 and 2. Average ratios are reported and uncertainty reflects one standard deviation. Expected ratios are calculated by dividing the MW of the construct by the MW of DecWT.

| Binding Occupancy Relative to DecWT |                 |          |
|-------------------------------------|-----------------|----------|
| Construct                           | Calculated      | Expected |
| DecCD40L                            | $2.61 \pm 0.06$ | 2.28     |
| DecSelf                             | $0.94 \pm 0.04$ | 1.13     |
| Dec $\Delta$ 11                     | $0.68 \pm 0.02$ | 0.89     |
| Dec $\Delta$ 20                     | $0.60 \pm 0.02$ | 0.83     |

## Construct Sequences

### DecWT

CCATGGGCAGCAGCCATCACCATCATCACCACAGCCTCGTCCCGCGGGCTCACAGGATCCCATGGCAAACCCAAAC  
TTCACGCCATCATGGCCTCTATACAAAGATGCTGACGGTGTATATGTGTCTGCGCTTCCGATTAAAGCTATCAAATA  
CGCTAATGACGGAAGTGCAAACGCAGAATTCGACGGCCCGTATGCTGACCAGTACATGTCAGCGCAAACAGTAGCCG  
TATTC AAGCCGGAGGTTGGCGGATATCTGTTCCGGAGCCAGTACGGCGAGCTGCTCTATATGAGCAAGACAGCATTT  
GAAGCTAACTACTTCTGCAAGCGGTTAGTAGCTAATGCAGAGACGGCGGATAAGTTATCTACTGCCCGCACTAT  
CACACTAACCGGAGCGGTCACAGGTTACAGCTCCTTTGATGGTTCCGGCTAACGTGACTATCGAAACAACATCAGGAA  
GTGAGCTC

### DecCD40L

CCATGGGCAGCAGCCATCACCATCATCACCACAGCCAGGATCCCATGGCAAACCCAAACTTCACGCCATCATGGCCT  
CTATACAAAGATGCTGACGGTGTATATGTGTCTGCGCTTCCGATTAAAGCTATCAAATACGCTAATGACGGAAGTGC  
AAACGCAGAATTCGACGGCCCGTATGCTGACCAGTACATGTCAGCGCAAACAGTAGCCGTATTC AAGCCGGAGGTTG  
GCGGATATCTGTTCCGGAGCCAGTACGGCGAGCTGCTCTATATGAGCAAGACAGCATTTGAAGCTAACTACTTCT  
GCAAGCGGTTAGTAGCTAATGCAGAGACGGCGGATAAGTTATCTACTGCCCGCACTATCACACTAACCGGAGCGGT  
CACAGGTTACAGCTCCTTTGATGGTTCCGGCTAACGTGACTATCGAAACAACATCAGGAAGTGAGCTCCAAAGAGGTG  
ATGAGGATCCTCAAATTGCAGCACACGTTGTAAGCGAAGCCAACAGTAATGCAGCATCCGTTCTACAGTGGGCCAAG  
AAAGGATATTATACCATGAAAAGCAACTTGGAATGCTTGAAAATGGGAAACAGCTGACGGTTAAAAGAGAAGGACT  
CTATTATGTCTACTCAAGTACCTTCTGCTCTAATCGGGAGCCTTCGAGTCAACGCCCATTCATCGTCGGCCTCT  
GGCTGAAGCCCAGCAGTGGATCTGAGAGAATCTTACTCAAGGCGGCAAATACCCACAGTTCCTCCCAGCTTTGCGAG  
CAGCAGTCTGTTCACTTGGGCGGAGTGTGTTGAATTACAAGCTGGTGCTTCTGTGTTTGTCAACGTGACTGAAGCAAG  
CCAAGTGATCCACAGAGTTGGCTTCTCATCTTTTGGCTTACTCAAACCTCTGAAAGCTT

### DecSelf

CCATGGGCAGCAGCCATCACCATCATCACCACAGCCAGGATCCCATGGCAAACCCAAACTTCACGCCATCATGGCCT  
CTATACAAAGATGCTGACGGTGTATATGTGTCTGCGCTTCCGATTAAAGCTATCAAATACGCTAATGACGGAAGTGC  
AAACGCAGAATTCGACGGCCCGTATGCTGACCAGTACATGTCAGCGCAAACAGTAGCCGTATTC AAGCCGGAGGTTG  
GCGGATATCTGTTCCGGAGCCAGTACGGCGAGCTGCTCTATATGAGCAAGACAGCATTTGAAGCTAACTACTTCT  
GCAAGCGGTTAGTAGCTAATGCAGAGACGGCGGATAAGTTATCTACTGCCCGCACTATCACACTAACCGGAGCGGT  
CACAGGTTACAGCTCCTTTGATGGTTCCGGCTAACGTGACTATCGAAACAACATCAGGAAGTGAGCTCGGCAACTATA  
CCTGCGAAGTGACCGAACTGACCCGCGAAGGCGAAACCATTATTGAACTGAAATAAAAGCTT

### DecΔ11

ATGGGCAGCAGCCATCACCATCATCACCACAGCCAGGATCCCCTATACAAAGATGCTGACGGTGTATATGTGTCTGC  
GCTTCCGATTAAAGCTATCAAATACGCTAATGACGGAAGTGCAAACGCAGAATTCGACGGCCCGTATGCTGACCAGT  
ACATGTCAGCGCAAACAGTAGCCGTATTC AAGCCGGAGGTTGGCGGATATCTGTTCCGGAGCCAGTACGGCGAGCTG  
CTCTATATGAGCAAGACAGCATTTGAAGCTAACTACTTCTGCAAGCGGTTAGTAGCTAATGCAGAGACGGCGGA  
TAAGTTATCTACTGCCCGCACTATCACACTAACCGGAGCGGTCACAGGTTACAGCTCCTTTGATGGTTCCGGCTAACG  
TGACTATCGAAACAACATCAGGAAGTTAA

### DecΔ20

ATGGGCAGCAGCCATCACCATCATCACCACAGCCAGGATCCCCTGTCTGCGCTTCCGATTAAAGCTATCAAATACGC  
TAATGACGGAAGTGCAAACGCAGAATTCGACGGCCCGTATGCTGACCAGTACATGTCAGCGCAAACAGTAGCCGTAT  
TCAAGCCGGAGGTTGGCGGATATCTGTTCCGGAGCCAGTACGGCGAGCTGCTCTATATGAGCAAGACAGCATTTGAA  
GCTAACTACTTCTGCAAGCGGTTAGTAGCTAATGCAGAGACGGCGGATAAGTTATCTACTGCCCGCACTATCAC

ACTAACCGGAGCGGTACACAGGTTTCAGCGTCCTTTTGATGGTTCGGCTAACGTGACTATCGAAACAACATCAGGAAGTT  
AA

IGOR fitting script

if (0<t<t0)

$$f(t) = ((R_{max1} * A) / ((k_{d1} / k_{a1}) + A)) * (1 - \exp(-(k_{a1} * A + k_{d1}) * t)) + ((R_{max2} * A) / ((k_{d2} / k_{a2}) + A)) * (1 - \exp(-(k_{a2} * A + k_{d2}) * t))$$

elseif (t>t0)

$$f(t) = ((R_{max1} * A) / ((k_{d1} / k_{a1}) + A)) * (1 - \exp(-(k_{a1} * A + k_{d1}) * t_0)) * \exp(-k_{d1} * (t - t_0)) + ((R_{max2} * A) / ((k_{d2} / k_{a2}) + A)) * (1 - \exp(-(k_{a2} * A + k_{d2}) * t_0)) * \exp(-k_{d2} * (t - t_0))$$

else

$$f(t) = 0$$

endif
